# Supplementary material for: Primary and metastatic breast tumors cross-talk to influence immunotherapy responses
Source: PubMed Central journal article supplement — Oncoimmunology. 2020 Aug 30;9(1):1802979. doi: 10.1080/2162402X.2020.1802979 (PMC7470186; doi:10.1080/2162402x.2020.1802979), 2020-08-30
Supplement: KONI_A_1802979_SM7869.pdf [file KONI_A_1802979_SM7869.pdf]

## Supplementary figure 1

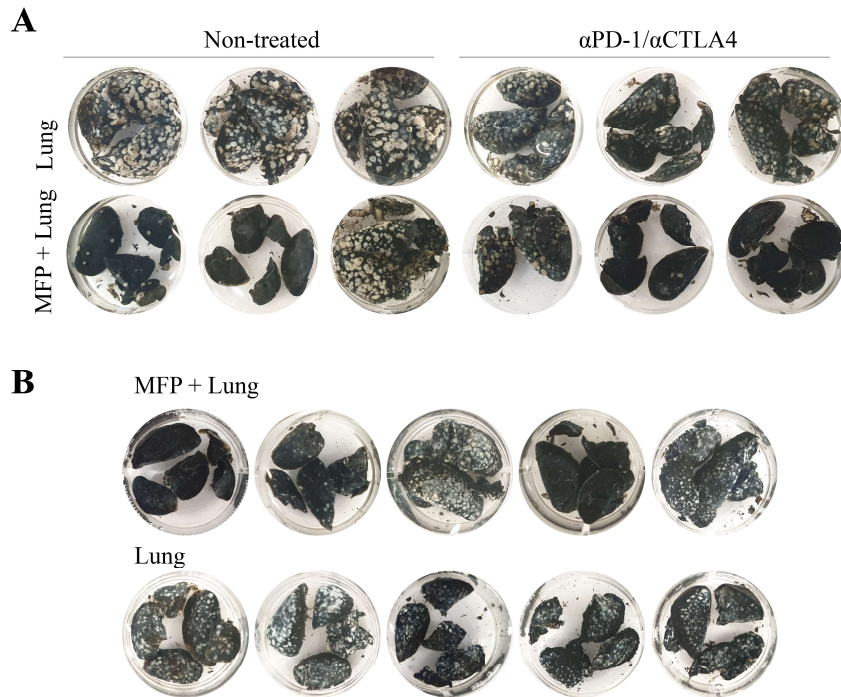

**Supplementary Figure 1: Representative images of lung metastases in mice with or without concomitant MFP tumors.** Images of India ink stained lungs with 67NR tumors from BALB/c mice with MFP and lung tumors (MFP + Lung) or lung tumors along (Lung) as described in **Figure 1F and G**. Lungs appear black with metastases in white. **A)** All images from representative experiment shown in **Figure 1F**. **B)** Representative images from one of three independent experiments shown in **Figure 1G**.

## Supplementary figure 2

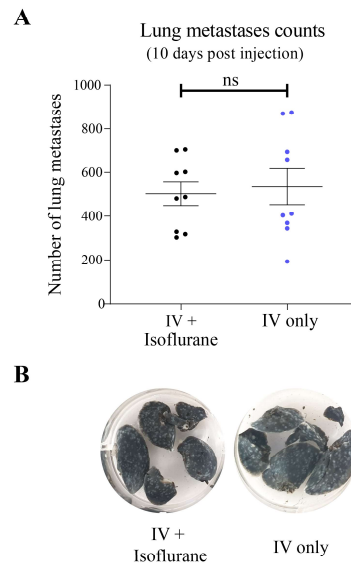

### Supplementary Figure 2: Isoflurane does not decrease lung metastases in IV injected mice.

BALB/c mice were injected with 67NR cells IV and returned to their cage (IV only) or put into a chamber with isoflurane for 5-10 minutes (IV + isoflurane) to simulate anaesthetic conditions of mice injected with concomitant MFP tumors. **A**) Enumeration of lung metastases and **B**) representative images of each group. Data points represent whole lungs of individual mice pooled from 2 independent experiments with mean  $\pm$  SEM ( $n = 4 - 5$  mice per group, per experiment). Unpaired  $t$ -test. ns  $P \geq 0.05$ .

### Supplementary Figure 3

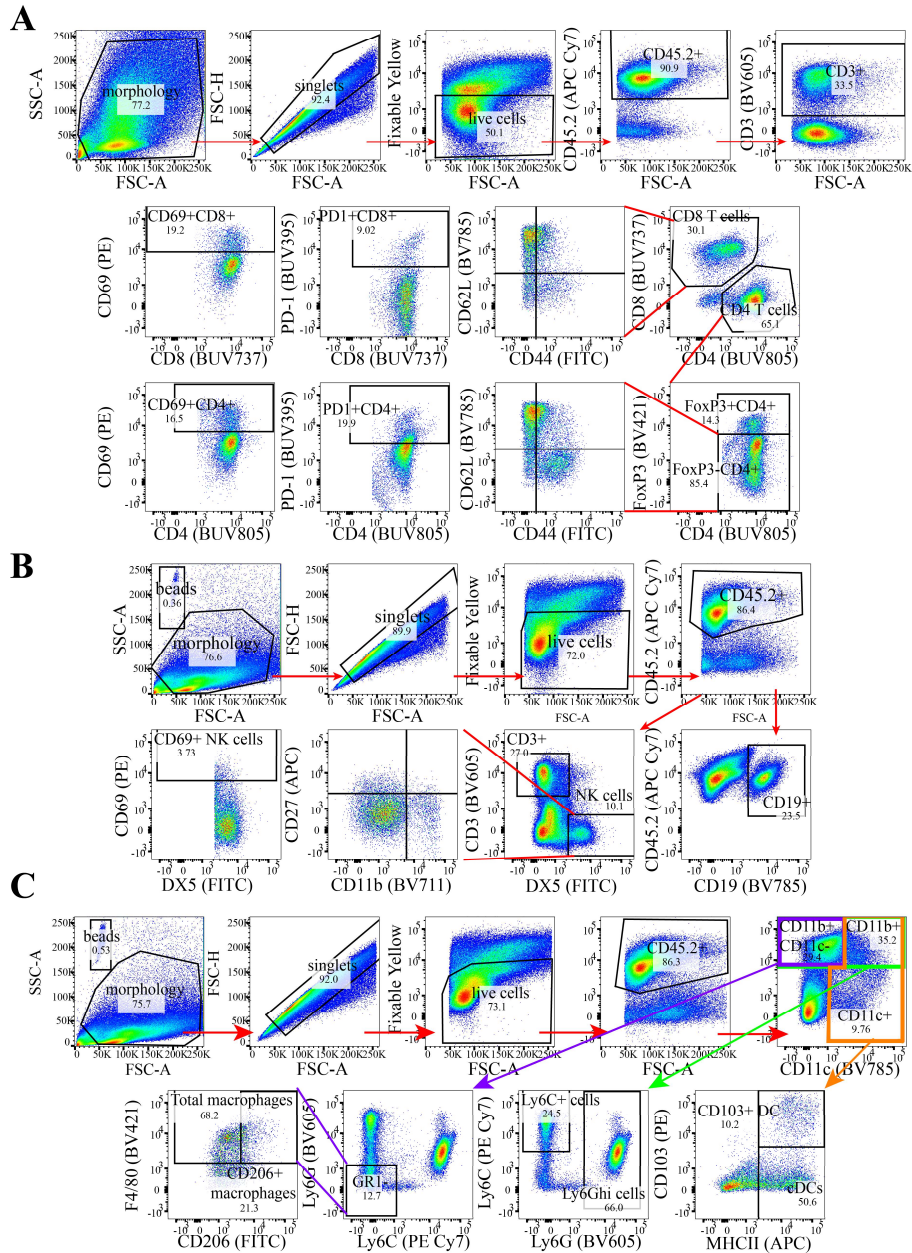

**Supplementary Figure 3: Gating strategy for flow cytometry of the immune TME.** MFP and lung tumors from mice injected with 67NR tumor cells (as outlined in Figure 1) were harvested and processed to a single cell suspension by collagenase digestion and 70  $\mu$ m filtration. Samples were stained with antibodies as indicated and analysed by flow cytometry. Diagrams show flow cytometry gating strategy from 3 different panels to identify indicated cell populations within tumors. **A)** T cell panel. **B)** NK cell/B cell panel. **C)** Myeloid panel.

## Supplementary figure 4

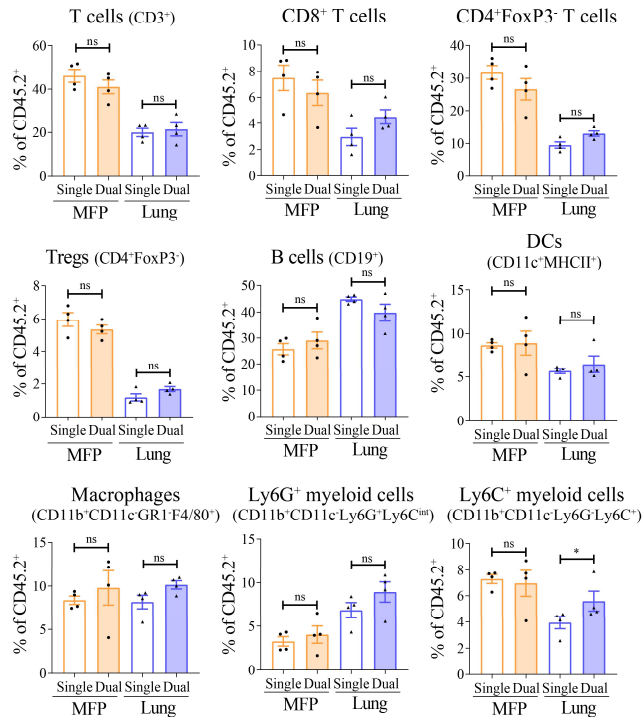

**Supplementary Figure 4: Immune cell frequencies by flow cytometry of MFP and lung tumors at treatment commencement.** MFP and lung tumors were harvested at 10 days post tumor injection and analysed by flow cytometry as indicated in **Supplementary Figure 3**. Data points represent individual tumors with  $n = 4$  mice per group. Bars represent mean  $\pm$  SEM. Mann-Whitney test. ns  $P \geq 0.05$ ;  $*P < 0.05$ .

## Supplementary figure 5

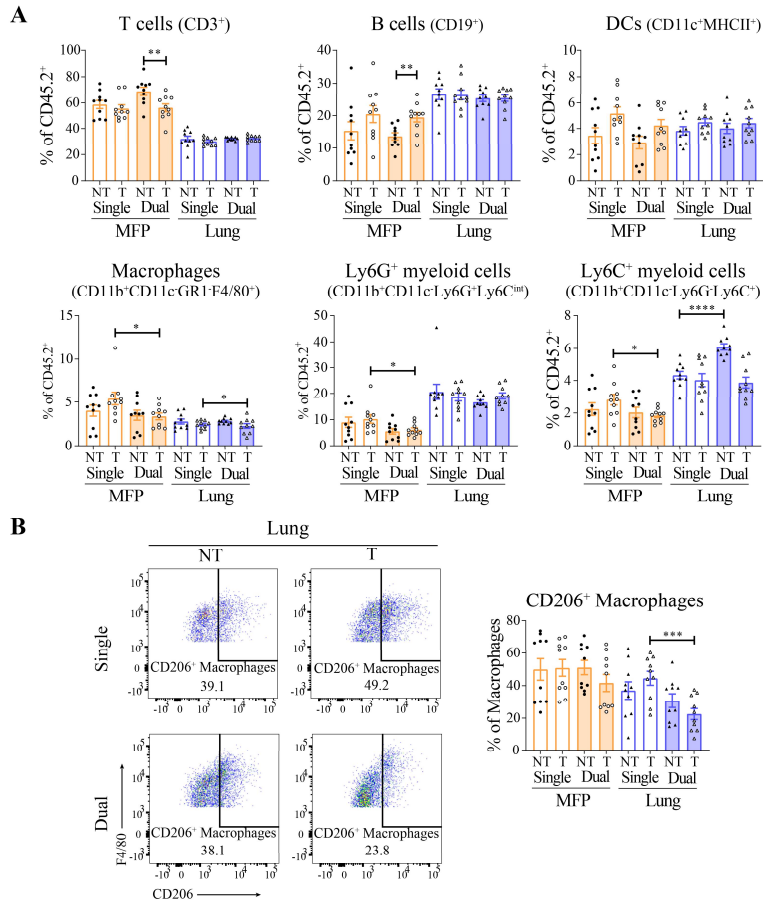

**Supplementary Figure 5: CD206<sup>+</sup> Macrophages are decreased by concomitant MFP tumor growth in treated lung tumors.** MFP and lung tumors were harvested at 7 days post treatment with  $\alpha$ PD-1/ $\alpha$ CTLA4 and analysed by flow cytometry as indicated in **Figure 2** and **Supplementary Figure 3**. **A)** Immune cell populations analysed during treatment. **B)** Analysis of CD206 expression in macrophages within lung tumors with representative plots alongside quantitation. Data points represent whole lungs from individual mice from 2 independent experiments with mean  $\pm$  SEM ( $n = 4 - 6$  mice per group, per experiment). Unpaired  $t$ -test. ns  $P \geq 0.05$ ; \* $P < 0.05$ ; \*\*\* $P \leq 0.001$ .
